# Supplementary material for: Unexpected absence of ribosomal protein genes from metagenome-assembled genomes
Source: PubMed Central journal article supplement (PMC9723686; doi:10.1038/s43705-022-00204-6), 2022-11-28
Supplement: 43705_2022_204_MOESM1_ESM.pdf [file 43705_2022_204_MOESM1_ESM.pdf]

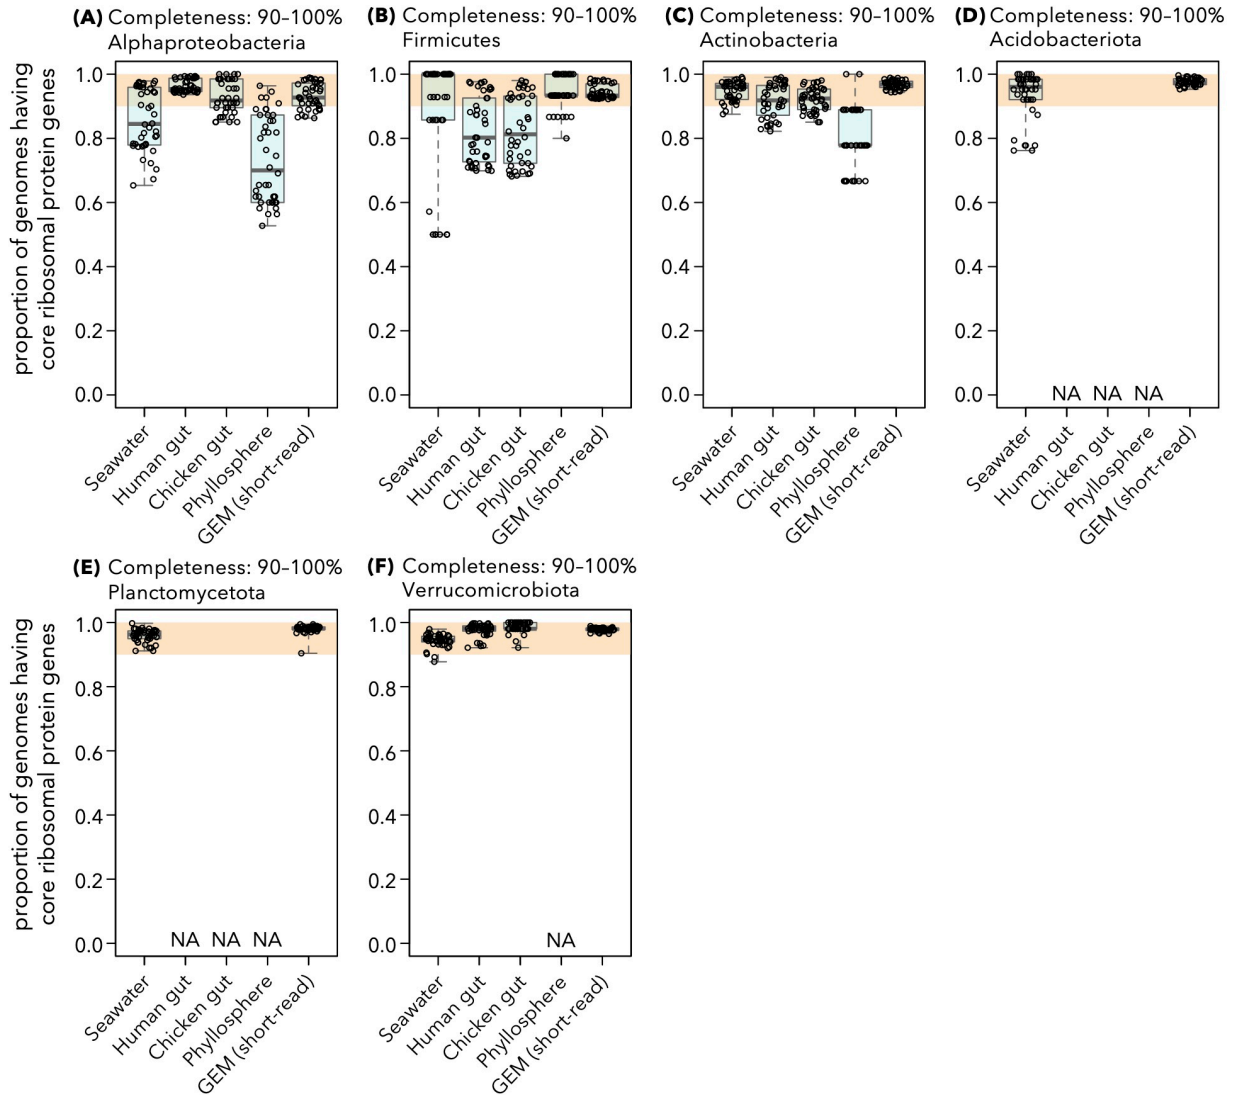

1

2 **Figure S1. Proportion of MAGs harboring each ribosomal protein ortholog from five MAG**

3 **datasets.** Each point represents one ribosomal protein ortholog (listed in Table S1). Lines within

4 each box and whiskers indicate three quartiles and the maximum/minimum values, respectively.

5 Orange bands indicate the value ranges that could be expected from completeness of MAGs. The

6 results for MAGs with 90–100% completeness that were classified as class Alphaproteobacteria

7 (A), phylum Firmicutes (B), phylum Actinobacteriota (C), phylum Acidobacteriota (D), phylum

8 Planctomycetota (E), or phylum Verrucomicrobiota (F) are shown. Panel (B) includes genomes

9 assigned as any phyla starting with “Firmicutes,” such as “Firmicutes\_A” and “Firmicutes\_B”.

10 NA indicates that no genomes in the dataset belonged to a specific clade. The definition of each

11 phylum/class is slightly inconsistent between the five sets of MAGs because different versions of

12 the GTDB were used for taxonomic annotations (Table 1).

13

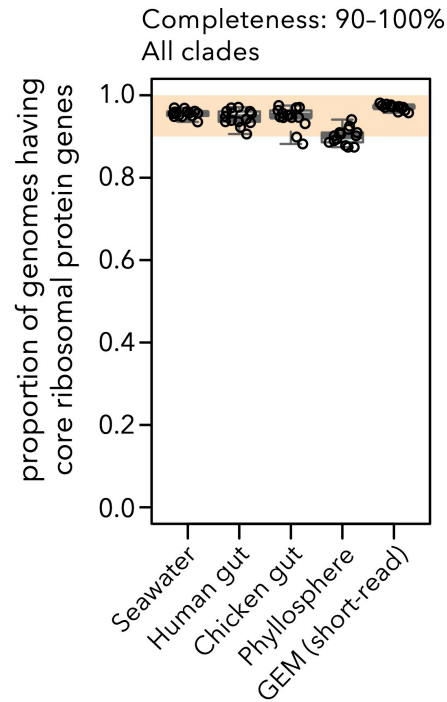

14

15 **Figure S2. Proportion of MAGs harboring 14 ribosomal protein orthologs from five MAG**  
 16 **datasets.** Same as Figure 1, but only 14 ribosomal protein orthologs, namely *rplM* (K02871),  
 17 *rplS* (K02884), *rplT* (K02887), *rplU* (K02888), *rpmA* (K02899), *rpmE* (K02909), *rplI* (K02939),  
 18 *rpsA* (K02945), *rpsO* (K02956), *rpsP* (K02959), *rpsB* (K02967), *rpsT* (K02968), *rpsF* (K02990),  
 19 and *rpsI* (K02996) in KEGG, are indicated. Each point represents one of these orthologs. Lines  
 20 within each box and whiskers indicate three quartiles and the maximum/minimum values,  
 21 respectively. Orange band indicates the value ranges that could be expected from completeness  
 22 of MAGs (i.e., 90–100%). Only bacterial MAGs with 90–100% completeness were used.

23

24

25

26

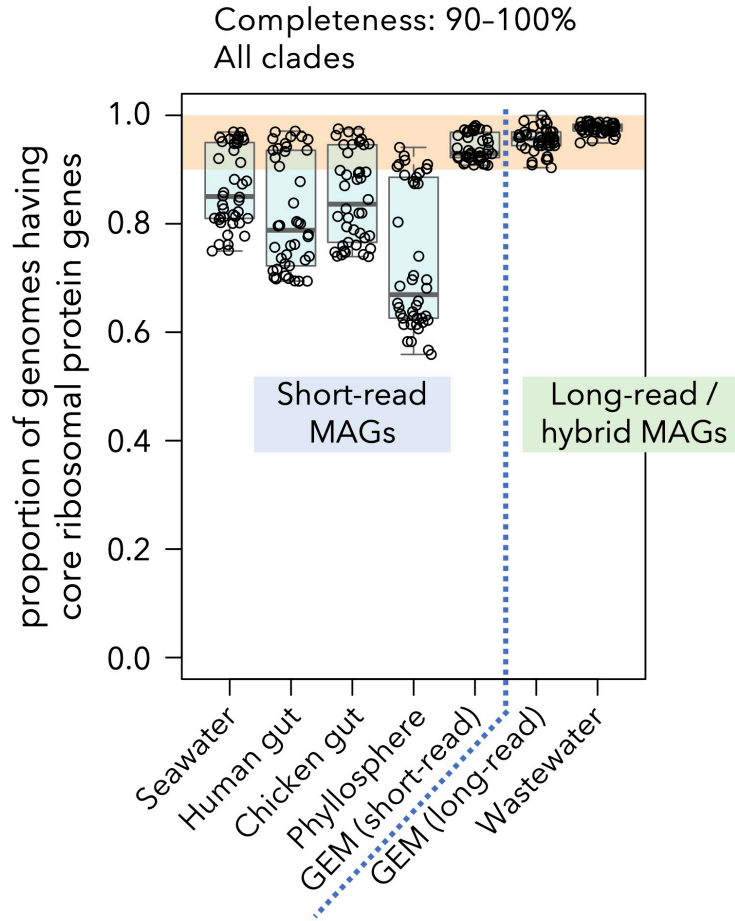

27

28 **Figure S3. Frequency of each ribosomal protein gene on MAGs constructed with and**  
 29 **without long-read sequences.** Same as Figure 1, but two additional MAG datasets that have  
 30 been constructed using long-read sequencers have been added. Only bacterial MAGs with 90–  
 31 100% completeness were used. Each point represents one ribosomal protein ortholog (listed in  
 32 Table S1). Lines within each box and whiskers indicate three quartiles and the  
 33 maximum/minimum values, respectively. Orange band indicates the value ranges that could be  
 34 expected from completeness of MAGs (i.e., 90–100%). Five columns on the left indicate the  
 35 results for MAGs constructed without long-read sequences, whereas the two columns on the  
 36 right indicate ones for MAGs constructed using long-read sequences.

37

38

39

40

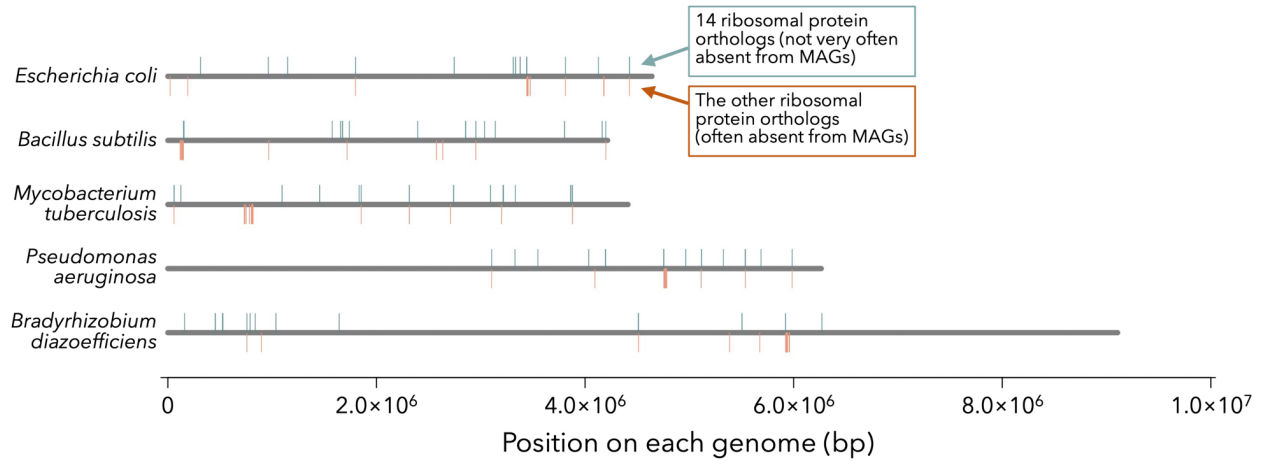

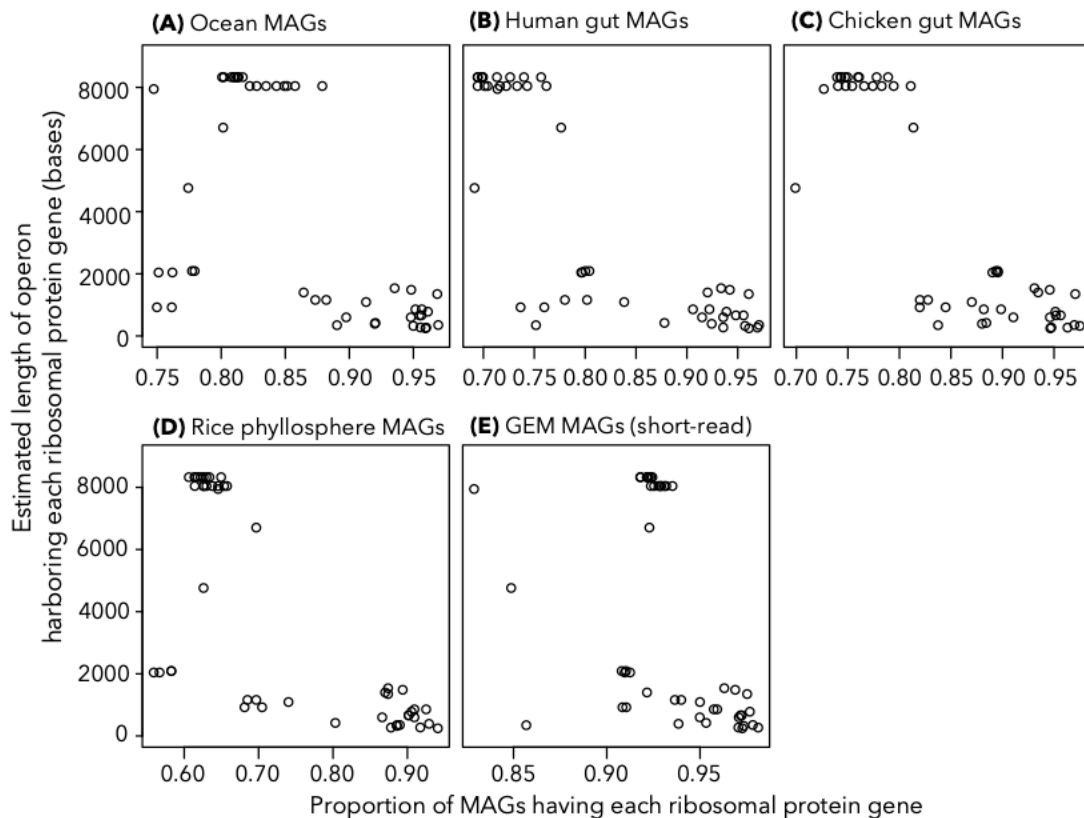

52

53

54 **Figure S5. Correlation between the proportion of MAGs harboring ribosomal protein gene**  
 55 **and the length of operon containing that ribosomal protein gene.** Each point represents one  
 56 ribosomal protein ortholog (listed in Table S1). Panels (A)–(E) indicate the results for seawater  
 57 MAGs, human gut MAGs, chicken gut MAGs, rice phyllosphere MAGs, and GEM MAGs (only  
 58 short-read ones), respectively.

59

60

61 **Table S1.** KEGG ortholog numbers determined as core ribosomal protein genes and single-copy  
62 genes that are conserved in most prokaryotic genomes.

| Category                | K numbers | Gene name / description                            |
|-------------------------|-----------|----------------------------------------------------|
| Ribosomal protein genes | K02863    | <i>rplA</i> large subunit ribosomal protein L1     |
|                         | K02864    | <i>rplJ</i> large subunit ribosomal protein L10    |
|                         | K02867    | <i>rplK</i> large subunit ribosomal protein L11    |
|                         | K02871    | <i>rplM</i> large subunit ribosomal protein L13    |
|                         | K02874    | <i>rplN</i> large subunit ribosomal protein L14    |
|                         | K02876    | <i>rplO</i> large subunit ribosomal protein L15    |
|                         | K02878    | <i>rplP</i> large subunit ribosomal protein L16    |
|                         | K02879    | <i>rplQ</i> large subunit ribosomal protein L17    |
|                         | K02881    | <i>rplR</i> large subunit ribosomal protein L18    |
|                         | K02884    | <i>rplS</i> large subunit ribosomal protein L19    |
|                         | K02886    | <i>rplB</i> large subunit ribosomal protein L2     |
|                         | K02887    | <i>rplT</i> large subunit ribosomal protein L20    |
|                         | K02888    | <i>rplU</i> large subunit ribosomal protein L21    |
|                         | K02890    | <i>rplV</i> large subunit ribosomal protein L22    |
|                         | K02892    | <i>rplW</i> large subunit ribosomal protein L23    |
|                         | K02895    | <i>rplX</i> large subunit ribosomal protein L24    |
|                         | K02899    | <i>rpmA</i> large subunit ribosomal protein L27    |
|                         | K02906    | <i>rplC</i> large subunit ribosomal protein L3     |
|                         | K02909    | <i>rpmE</i> large subunit ribosomal protein L31    |
|                         | K02926    | <i>rplD</i> large subunit ribosomal protein L4     |
|                         | K02931    | <i>rplE</i> large subunit ribosomal protein L5     |
|                         | K02933    | <i>rplF</i> large subunit ribosomal protein L6     |
|                         | K02935    | <i>rplL</i> large subunit ribosomal protein L7/L12 |
|                         | K02939    | <i>rplI</i> large subunit ribosomal protein L9     |
|                         | K02945    | <i>rpsA</i> small subunit ribosomal protein S1     |
|                         | K02946    | <i>rpsJ</i> small subunit ribosomal protein S10    |
|                         | K02948    | <i>rpsK</i> small subunit ribosomal protein S11    |
|                         | K02950    | <i>rpsL</i> small subunit ribosomal protein S12    |
|                         | K02952    | <i>rpsM</i> small subunit ribosomal protein S13    |
|                         | K02956    | <i>rpsO</i> small subunit ribosomal protein S15    |
|                         | K02959    | <i>rpsP</i> small subunit ribosomal protein S16    |
|                         | K02961    | <i>rpsQ</i> small subunit ribosomal protein S17    |
|                         | K02965    | <i>rpsS</i> small subunit ribosomal protein S19    |
|                         | K02967    | <i>rpsB</i> small subunit ribosomal protein S2     |
|                         | K02968    | <i>rpsT</i> small subunit ribosomal protein S20    |
|                         | K02982    | <i>rpsC</i> small subunit ribosomal protein S3     |
|                         | K02986    | <i>rpsD</i> small subunit ribosomal protein S4     |
|                         | K02988    | <i>rpsE</i> small subunit ribosomal protein S5     |
|                         | K02990    | <i>rpsF</i> small subunit ribosomal protein S6     |
|                         | K02992    | <i>rpsG</i> small subunit ribosomal protein S7     |
|                         | K02994    | <i>rpsH</i> small subunit ribosomal protein S8     |
|                         | K02996    | <i>rpsI</i> small subunit ribosomal protein S9     |

64 **Table S1: continued**

| Category                    | K numbers | Gene name / description                                            |
|-----------------------------|-----------|--------------------------------------------------------------------|
| Conserved single-copy genes | K00554    | <i>trmD</i> tRNA (guanine37-N1)-methyltransferase [EC:2.1.1.228]   |
|                             | K00962    | <i>pnp</i> polyribonucleotide nucleotidyltransferase [EC:2.7.7.8]  |
|                             | K01409    | N6-L-threonylcarbamoyladenine synthase [EC:2.3.1.234]              |
|                             | K01869    | <i>leuS</i> leucyl-tRNA synthetase [EC:6.1.1.4]                    |
|                             | K01870    | <i>ileS</i> isoleucyl-tRNA synthetase [EC:6.1.1.5]                 |
|                             | K01875    | <i>serS</i> seryl-tRNA synthetase [EC:6.1.1.11]                    |
|                             | K01887    | <i>argS</i> arginyl-tRNA synthetase [EC:6.1.1.19]                  |
|                             | K01889    | <i>pheS</i> phenylalanyl-tRNA synthetase alpha chain [EC:6.1.1.20] |
|                             | K01890    | <i>pheT</i> phenylalanyl-tRNA synthetase beta chain [EC:6.1.1.20]  |
|                             | K01892    | <i>hisS</i> histidyl-tRNA synthetase [EC:6.1.1.21]                 |
|                             | K02343    | <i>dnaX</i> DNA polymerase III subunit gamma/tau [EC:2.7.7.7]      |
|                             | K02520    | <i>infC</i> translation initiation factor IF-3                     |
|                             | K02600    | <i>nusA</i> transcription termination/antitermination protein NusA |
|                             | K02601    | <i>nusG</i> transcription termination/antitermination protein NusG |
|                             | K02835    | <i>prfA</i> peptide chain release factor 1                         |
|                             | K02836    | <i>prfB</i> peptide chain release factor 2                         |
|                             | K02838    | <i>frr</i> ribosome recycling factor                               |
|                             | K03046    | <i>rpoC</i> DNA-directed RNA polymerase subunit beta' [EC:2.7.7.6] |
|                             | K03076    | <i>secY</i> preprotein translocase subunit SecY                    |
|                             | K03177    | <i>truB</i> tRNA pseudouridine55 synthase [EC:5.4.99.25]           |
|                             | K03545    | <i>tig</i> trigger factor                                          |
|                             | K03550    | <i>ruvA</i> holliday junction DNA helicase RuvA [EC:5.6.2.4]       |
|                             | K03551    | <i>ruvB</i> holliday junction DNA helicase RuvB [EC:5.6.2.4]       |
|                             | K03553    | <i>recA</i> recombination protein RecA                             |
|                             | K03596    | <i>lepA</i> GTP-binding protein LepA                               |
|                             | K03625    | <i>nusB</i> transcription antitermination protein NusB             |
|                             | K03664    | <i>smpB</i> SsrA-binding protein                                   |
|                             | K03702    | <i>uvrB</i> excinuclease ABC subunit B                             |
|                             | K03977    | <i>engA</i> GTPase                                                 |
|                             | K03979    | <i>obgE</i> GTPase [EC:3.6.5.-]                                    |
|                             | K04075    | <i>tilS</i> tRNA(Ile)-lysidine synthase [EC:6.3.4.19]              |
|                             | K06187    | <i>recR</i> recombination protein RecR                             |

66 **Table S2.** Unassembled shotgun metagenomic datasets used for this study.

| Source Environment | Reference               | INSDC accession number |
|--------------------|-------------------------|------------------------|
| Human gut          | Hildebrand et al., 2021 | ERR4794107             |
|                    |                         | ERR4794313             |
|                    |                         | ERR4794328             |
|                    |                         | ERR4794333             |
|                    |                         | ERR4794596             |
| Seawater           | Sunagawa et al., 2015   | ERR598950              |
|                    |                         | ERR599066              |
|                    |                         | ERR599090              |
| Soil               | Li et al., 2018         | SRR5512140             |
|                    |                         | SRR5512146             |
|                    |                         | SRR5512147             |

67

68 **Table S3.** A list of 103 tetranucleotides that appears in mutually independent frequency.

|      |      |      |      |      |      |      |      |       |      |      |      |
|------|------|------|------|------|------|------|------|-------|------|------|------|
| CATT | CCGT | CCTT | CGCT | CGGT | CGTG | CGTT | CTAT | CTCT  | CTGG | CTGT | CTTG |
| CTTT | GAAT | GACT | GAGT | GATC | GATG | GATT | GCAT | GCCT  | GCGG | GCGT | GCTC |
| GCTG | GCTT | GGAT | GGCC | GGCG | GGCT | GGGC | GGGG | GGGT  | GGTC | GGTG | GGTT |
| GTAG | GTAT | GTCC | GTCG | GTCT | GTGC | GTGG | GTGT | G TTC | GTTG | GTTT | TAAG |
| TAAT | TACC | TACG | TACT | TAGC | TAGG | TAGT | TATA | TATC  | TATG | TATT | TCAG |
| TCAT | TCCC | TCCG | TCCT | TCGA | TCGC | TCGG | TCGT | TCTA  | TCTC | TCTG | TCTT |
| TGAC | TGAG | TGAT | TGCA | TGCC | TGCG | TGCT | TGGA | TGGC  | TGGG | TGGT | TGTA |
| TGTC | TGTG | TGTT | TTAA | TTAC | TTAG | TTAT | TTCA | TTCC  | TTCG | TTCT | TTGA |
| TTGC | TTGG | TTGT | TTTA | TTTC | TTTG | TTTT |      |       |      |      |      |

69
